# Supplementary material for: Epidermal Growth Factor‐Like Repeats and Discoidin I‐Like Domains 3 Deficiency Attenuates Dilated Cardiomyopathy by Inhibiting Ubiquitin Specific Peptidase 10 Dependent Smad4 Deubiquitination
Source: PubMed Central journal article supplement — J Am Heart Assoc. 2024 Mar 8;13(6):e031283. doi: 10.1161/JAHA.123.031283 (PMC11010021; doi:10.1161/jaha.123.031283), 2024-03-08
Supplement: JAH3-13-e031283-s001.pdf [file JAH3-13-e031283-s001.pdf]

# **SUPPLEMENTAL MATERIAL**

**Table S1. Information of primary antibodies.**

| Antibody                               | Cat no.     | Company                   | Source | Application | Dilution | Molecular weight |
|----------------------------------------|-------------|---------------------------|--------|-------------|----------|------------------|
| EDIL3                                  | SC-293337   | Santa Cruz                | Mouse  | WB,IF       | 1:500    | 54kDa            |
| CD31                                   | SC-376764   | Santa Cruz                | Mouse  | WB,IF       | 1:500    | 130kDa           |
| $\alpha$ SMA                           | ab5694      | Abcam                     | Rabbit | WB,IF       | 1:1000   | 42kDa            |
| VE-Cadherin                            | YT4869      | Immunoway                 | Rabbit | WB          | 1:1000   | 120kDa           |
| Vimentin                               | 10366-1-AP  | Proteintech               | Rabbit | WB          | 1:1000   | 54kDa            |
| CoraLite® Plus 488-conjugated Vimentin | CL488-10366 | Proteintech               | Rabbit | FC          | 1:100    | -                |
| USP10                                  | 8501S       | Cell Signaling Technology | Rabbit | WB          | 1:1000   | 110kDa           |
| Ubiquitin                              | A19686      | ABclonal                  | Rabbit | WB          | 1:1000   | -                |
| Smad4                                  | 46535       | Cell Signaling Technology | Rabbit | WB          | 1:1000   | 70kDa            |
| Tgf- $\beta$ 1                         | SC-130348   | Santa Cruz                | Mouse  | WB          | 1:500    | 25kDa            |
| Bmp2                                   | 100875      | GeenTex                   | Rabbit | WB          | 1:1000   | 47kDa            |
| Bmp4                                   | 129156      | GeenTex                   | Rabbit | WB          | 1:1000   | 49kDa            |
| Bmp7                                   | ab214821    | Abcam                     | Rabbit | WB          | 1:1000   | 44kDa            |
| P-Smad2/3                              | 3108        | Cell Signaling Technology | Rabbit | WB          | 1:1000   | 37/50kDa         |
| T-Smad2/3                              | 8685        | Cell Signaling Technology | Rabbit | WB          | 1:1000   | 37/50kDa         |
| Smad7                                  | SC-101152   | Santa Cruz                | Mouse  | WB          | 1:500    | 46kDa            |
| Snail1                                 | 340942      | Zenbio                    | Rabbit | WB          | 1:1000   | 29kDa            |
| Twist1                                 | YN2923      | Immunoway                 | Rabbit | WB          | 1:1000   | 22kDa            |
| ITGB3                                  | A19073      | ABclonal                  | Rabbit | WB          | 1:1000   | 110kDa           |
| GAPDH                                  | GTX100118   | GeenTex                   | Rabbit | WB          | 1:5000   | 37kDa            |
| P-Erk                                  | 4370S       | Cell Signaling Technology | Rabbit | WB          | 1:1000   | 42/44kDa         |
| T-Erk                                  | 4695S       | Cell Signaling Technology | Rabbit | WB          | 1:1000   | 42/44kDa         |
| P-Akt                                  | 4060S       | Cell Signaling Technology | Rabbit | WB          | 1:1000   | 60kDa            |
| T-Akt                                  | 9272S       | Cell Signaling Technology | Rabbit | WB          | 1:1000   | 60kDa            |

|       |       |                              |        |    |        |       |
|-------|-------|------------------------------|--------|----|--------|-------|
| P-P65 | 3033S | Cell Signaling<br>Technology | Rabbit | WB | 1:1000 | 65kDa |
| T-P65 | 8242S | Cell Signaling<br>Technology | Rabbit | WB | 1:1000 | 65kDa |

---

**Table S2. Primers for quantitative real-time PCR.**

| <b>Genes</b> | <b>Forward (5' to 3')</b> | <b>Reverse (5' to 3')</b> |
|--------------|---------------------------|---------------------------|
| <b>MOUSE</b> |                           |                           |
| Smad4        | CATTCCAGCGTGCCATTTC       | TTCAAAGTAAGCAATGGAGCAC    |
| GAPDH        | ACTCCACTCACGGCAAATTC      | TCTCCATGGTGGTGAAGACA      |
| <b>HUMAN</b> |                           |                           |
| USP4         | CCCTACCGAGGCGTGGAATA      | CGACTTTGCAGTGCTTGACA      |
| USP10        | AATAAAGGGGAAGTGGTGC       | CTATCATGGGTGTTGACGT       |
| USP14        | ATGCCGCTCTACTCCGTTACT     | GCCTTGAATACCATTGGAGGTTTC  |
| Smad4        | CAGGATCAGTAGGTGGAATAGC    | TCTTTGATGCTCTGTCTTGGG     |
| GAPDH        | CCATGGAGAAGGCTGGGG        | CAAAGTTGTCATGGATGACC      |

**Table S3. Body Characteristics and Echocardiography Measurements for WT and KO Mice Treated With DOX or saline at 3 weeks following completion of DOX challenge (2.5mg/kg/week, six weeks).**

| Group                | Sham-WT   | Sham-KO   | DCM-WT     | DCM-KO     |
|----------------------|-----------|-----------|------------|------------|
| Number of animals    | n=10      | n=10      | n=10       | n=10       |
| Body characteristics |           |           |            |            |
| HW(mg)               | 140.0±3.4 | 136.9±4.4 | 91.3±2.4*  | 102.2±6.3# |
| BW(g)                | 31.4±0.7  | 31.4±0.9  | 22.1±0.6*  | 24.4±0.8   |
| HW/BW(mg/g)          | 4.45±0.11 | 4.35±0.19 | 4.12±0.07* | 4.17±0.24  |
| HW/TL(mg/mm)         | 6.25±0.21 | 6.09±0.22 | 4.48±0.17* | 4.98±0.33# |
| Cardiac structure    |           |           |            |            |
| IVSd(mm)             | 0.87±0.10 | 0.90±0.23 | 0.78±0.09* | 0.75±0.10  |
| LVIDd(mm)            | 3.65±0.39 | 3.55±0.26 | 3.95±0.37* | 3.72±0.33  |
| LVPWd(mm)            | 0.88±0.15 | 0.92±0.15 | 0.57±0.10* | 0.80±0.08# |
| IVSs(mm)             | 1.50±0.13 | 1.45±0.15 | 1.08±0.16* | 1.20±0.06  |
| LVIDs(mm)            | 1.83±0.23 | 1.87±0.16 | 3.01±0.20* | 2.55±0.27# |
| LVPWs(mm)            | 1.37±0.24 | 1.37±0.05 | 0.78±0.08* | 0.87±0.19  |
| Cardiac function     |           |           |            |            |
| LVEDV(ml)            | 0.13±0.04 | 0.12±0.03 | 0.16±0.04  | 0.13±0.03  |
| LVESV(ml)            | 0.02±0.01 | 0.02±0.01 | 0.07±0.01* | 0.04±0.01# |
| SV(ml)               | 0.11±0.04 | 0.10±0.02 | 0.08±0.03* | 0.09±0.02  |
| EF(%)                | 85.8±2.0  | 85.7±2.3  | 53.5±6.9*  | 65.9±4.9#  |
| FS(%)                | 49.8±2.4  | 47.4±3.1  | 23.4±3.7*  | 31.4±3.7#  |

HW, heart weight; BW, body weight; TL, tibia length; DCM, , dilated cardiomyopathy; IVS, intraventricular septum; LVID, left ventricular internal dimension; LVPW, left ventricular posterior wall thickness; LVEDV, left ventricular end-diastolic volume; EF, ejection fraction; FS, fractional shortening. \* indicated P < 0.05 vs. Sham-WT group. # indicated P < 0.05 vs. DCM-WT group.

**Figure S1. Scheme of DOX challenge in mice and time points of functional assessments.**

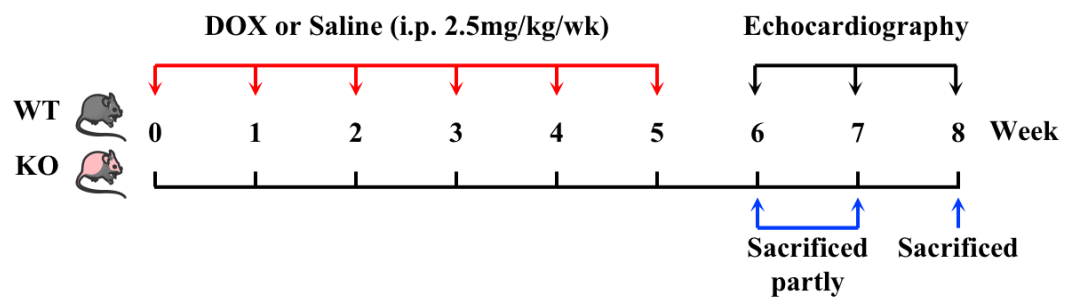

**Figure S2. Inhibiting  $\beta 3$  intergrin/ERK signal blocked USP10 expression promoted by EDIL3.**

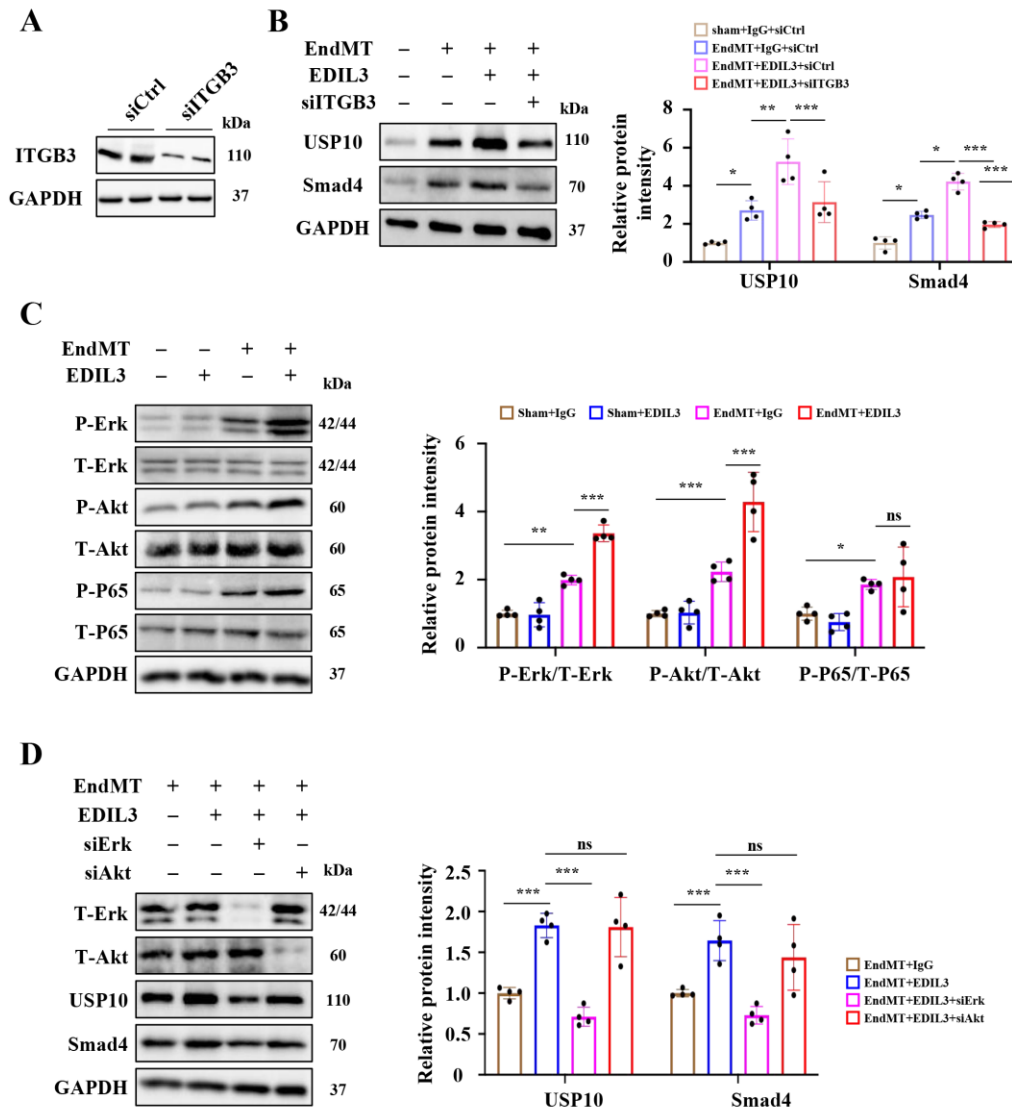

(A) Representative immunoblots for ITGB3 in HUVECs (n=2). (B) Representative immunoblots and corresponding quantification showing USP10 and Smad4 (n=4). (C) Representative immunoblots and corresponding quantification showing P-Erk, T-Erk, P-Akt, T-Akt, P-P65 and T-P65 (n=4). (D) Representative immunoblots and corresponding quantification showing T-Erk, T-Akt, USP10 and Smad4 (n=4). Data are presented as mean  $\pm$  SD and were analyzed using two-way ANOVA followed by Tukey test. ns indicated  $P > 0.05$ , \* indicated  $P < 0.05$ , \*\* indicated  $P < 0.01$ , \*\*\* indicated  $P < 0.001$ . EDIL3, epidermal growth factor-like repeats and discoidin I-like domains 3; EndMT, endothelial to mesenchymal transition; HUVEC, human umbilical vein endothelial cell; USP, ubiquitin specific peptidase; ITGB3, integrin  $\beta 3$ ; Erk, extracellular signal-regulated kinases; Akt, protein kinase B.
